# Supplementary material
Source: PubMed Central journal article supplement (PMC6925643)
Supplement: NIHMS1542597-supplement-1.pdf [file NIHMS1542597-supplement-1.pdf]

Supplementary Table 1. Fixed effects of cohort

|                 | Global cognition           |                              | Memory                     |                              | Language                   |                              | Visuospatial               |                              |
|-----------------|----------------------------|------------------------------|----------------------------|------------------------------|----------------------------|------------------------------|----------------------------|------------------------------|
|                 | Unadjusted Model           | Adjusted Step 1 <sup>1</sup> |
|                 | Estimate [95% CI]          | Estimate [95% CI]            |
| <u>All</u>      |                            |                              |                            |                              |                            |                              |                            |                              |
| i cohort effect | .231***<br>[.190; .271]    | .081**<br>[.032; .131]       | .278***<br>[.227; .329]    | .033<br>[-.033; .099]        | .246***<br>[.197; .294]    | .166***<br>[.106; .226]      | .173***<br>[.128; .218]    | .071**<br>[.018; .125]       |
| s cohort effect | .026***<br>[.021; .032]    | .012**<br>[.005; .020]       | .039***<br>[.026; .053]    | .015<br>[-.001; .030]        | .022***<br>[.014; .030]    | .011*<br>[.002; .021]        | .022***<br>[.016; .028]    | .017***<br>[.009; .024]      |
| i 1905-1920     | .101***<br>[.068; .133]    | .197***<br>[.161; .234]      | .078***<br>[.037; .119]    | .236***<br>[.188; .284]      | .039*<br>[.001; .078]      | .091***<br>[.046; .136]      | .139***<br>[.102; .175]    | .204***<br>[.164; .244]      |
| s 1905-1920     | -.058***<br>[-.063; -.053] | -.050***<br>[-.056; -.044]   | -.103***<br>[-.115; -.090] | -.088***<br>[-.101; -.076]   | -.045***<br>[-.052; -.038] | -.039***<br>[-.047; -.032]   | -.035***<br>[-.040; -.029] | -.031***<br>[-.037; -.025]   |
| <u>Whites</u>   |                            |                              |                            |                              |                            |                              |                            |                              |
| i cohort effect | .309***<br>[.242; .377]    | .151**<br>[.055; .247]       | .424***<br>[.322; .525]    | .158*<br>[.018; .297]        | .321***<br>[.227; .415]    | .230**<br>[.088; .372]       | .163***<br>[.110; .216]    | .083*<br>[.016; .15]         |
| s cohort effect | .030***<br>[.020; .041]    | .013<br>[.000; .026]         | .036***<br>[.017; .056]    | .014<br>[-.012; .040]        | .016*<br>[.003; .029]      | .016<br>[-.001; .033]        | .018***<br>[.008; .027]    | .007<br>[-.004; .019]        |
| i 1905-1920     | .402***<br>[.346; .459]    | .511***<br>[.437; .585]      | .290***<br>[.204; .377]    | .470***<br>[.364; .577]      | .382***<br>[.301; .462]    | .440***<br>[.328; .551]      | .515***<br>[.472; .559]    | .57***<br>[.519; .621]       |
| s 1905-1920     | -.060***<br>[-.070; -.050] | -.049***<br>[-.060; -.038]   | -.091***<br>[-.107; -.074] | -.080***<br>[-.100; -.059]   | -.044***<br>[-.056; -.032] | -.048***<br>[-.062; -.033]   | -.028***<br>[-.037; -.019] | -.021***<br>[-.031; -.012]   |
| <u>Blacks</u>   |                            |                              |                            |                              |                            |                              |                            |                              |
| i cohort effect | .217***<br>[.155; .279]    | .112**<br>[.028; .197]       | .249***<br>[.163; .336]    | .045<br>[-.072; .163]        | .247***<br>[.177; .318]    | .227***<br>[.134; .319]      | .156***<br>[.090; .222]    | .093*<br>[.003; .182]        |
| s cohort effect | .027***                    | .011                         | .051***                    | .022                         | .019**                     | .007                         | .024***                    | .018**                       |

|                 |                |                |                |                |                |                |                |                |
|-----------------|----------------|----------------|----------------|----------------|----------------|----------------|----------------|----------------|
|                 | [.017; .037]   | [-.002; .024]  | [.030; .072]   | [-.003; .046]  | [.007; .030]   | [-.007; .022]  | [.014; .034]   | [.006; .03]    |
| i 1905-1920     | .134***        | .197***        | .071*          | .195***        | .097***        | .109**         | .191***        | .23***         |
|                 | [.086; .181]   | [.138; .256]   | [.004; .138]   | [.116; .274]   | [.043; .151]   | [.043; .174]   | [.138; .245]   | [.164; .295]   |
| s 1905-1920     | -.062***       | -.053***       | -.109***       | -.091***       | -.046***       | -.041***       | -.037***       | -.033***       |
|                 | [-.071; -.053] | [-.062; -.044] | [-.127; -.091] | [-.109; -.074] | [-.056; -.036] | [-.051; -.031] | [-.046; -.027] | [-.043; -.023] |
| Hispanics       |                |                |                |                |                |                |                |                |
| i cohort effect | .166***        | .018           | .180***        | -.048          | .163***        | .074           | .168***        | .052           |
|                 | [.106; .227]   | [-.060; .097]  | [.106; .253]   | [-.144; .048]  | [.095; .232]   | [-.012; .161]  | [.093; .243]   | [-.044; .149]  |
| s cohort effect | .023***        | .012           | .027**         | .004           | .022***        | .011           | .022***        | .02**          |
|                 | [.013; .033]   | [.000; .025]   | [.008; .046]   | [-.018; .026]  | [.010; .033]   | [-.004; .025]  | [.011; .032]   | [.006; .035]   |
| i 1905-1920     | -.122***       | -.027          | -.049          | .098**         | -.222***       | -.165***       | -.148***       | -.074*         |
|                 | [-.172; -.072] | [-.086; .032]  | [-.111; .013]  | [.026; .170]   | [-.278; -.166] | [-.23; -.099]  | [-.211; -.086] | [-.146; -.001] |
| s 1905-1920     | -.054***       | -.048***       | -.099***       | -.084***       | -.039***       | -.034***       | -.035***       | -.034***       |
|                 | [-.063; -.045] | [-.057; -.038] | [-.115; -.083] | [-.101; -.067] | [-.050; -.029] | [-.045; -.022] | [-.044; -.026] | [-.045; -.024] |

Note. i = intercept, s = slope; 95% CI = 95% confidence interval; i = intercept, s = slope; the 1921-1935 cohort parameters are the 1905-1920 cohort's value + cohort effect; <sup>1</sup>covariates are age, sex, and

baseline memory complaints for models in the subgroups, plus race in the model with all participants; \*p < .05, \*\*p < .01, \*\*\*p < .001

Supplementary Table 2. Covariate effects in the whole sample

|                         |                     | Initial level (intercept) |                         | Linear change (slope)   |                         |
|-------------------------|---------------------|---------------------------|-------------------------|-------------------------|-------------------------|
| <u>Global cognition</u> |                     | Est. [95% CI] 1905-1920   | Est. [95% CI] 1921-1935 | Est. [95% CI] 1905-1920 | Est. [95% CI] 1921-1935 |
| Step 1                  | Age                 | -.020*** [-.028; -.013]   | -.016*** [-.022; -.010] | -.003** [-.004; -.001]  | -.002*** [-.003; -.001] |
|                         | Sex/gender (female) | -.001 [-.063; .060]       | .073** [.029; .116]     | .006 [-.006; .017]      | .003 [-.003; .009]      |
|                         | Race (Black)        | -.289*** [-.363; -.215]   | -.368*** [-.420; -.316] | -.006 [-.019; .007]     | -.005 [-.012; .002]     |
|                         | Race (Hispanic)     | -.545*** [-.620; -.469]   | -.668*** [-.717; -.619] | .002 [-.012; .015]      | -.001 [-.008; .006]     |
|                         | Memory complaints   | -.029** [-.048; -.011]    | -.040*** [-.053; -.027] | -.001 [-.005; .002]     | -.001 [-.003; .001]     |
| Step 2                  | CVD burden          | -.030 [-.061; .001]       | -.018 [-.040; .004]     | .000 [-.005; .005]      | -.001 [-.004; .002]     |
| Step 3                  | Education           | .056*** [.048; .064]      | .057*** [.051; .062]    | -.001 [-.002; .001]     | .001** [.000; .002]     |
| Step 4                  | CSES                | .035 [-.019; .089]        | .026 [-.010; .062]      | -.006 [-.015; .003]     | -.003 [-.008; .002]     |
| <u>Memory</u>           |                     |                           |                         |                         |                         |
| Step 1                  | Age                 | -.035*** [-.044; -.025]   | -.029*** [-.037; -.021] | -.005*** [-.008; -.003] | -.003*** [-.004; -.001] |
|                         | Sex/gender (female) | .163*** [.079; .248]      | .197*** [.138; .255]    | .000 [-.017; .018]      | .005 [-.005; .015]      |
|                         | Race (Black)        | -.260*** [-.367; -.153]   | -.409*** [-.483; -.336] | -.010 [-.032; .011]     | -.008 [-.019; .003]     |
|                         | Race (Hispanic)     | -.368*** [-.472; -.264]   | -.589*** [-.656; -.522] | -.002 [-.024; .020]     | -.003 [-.014; .008]     |
|                         | Memory complaints   | -.068*** [-.093; -.044]   | -.053*** [-.070; -.035] | -.001 [-.007; .004]     | -.003 [-.006; .000]     |
| Step 2                  | CVD burden          | -.015 [-.057; .026]       | -.025 [-.055; .005]     | .000 [-.008; .007]      | .002 [-.002; .007]      |
| Step 3                  | Education           | .042*** [.031; .053]      | .041*** [.032; .049]    | -.001 [-.003; .001]     | .002** [.001; .003]     |
| Step 4                  | CSES                | .007 [-.067; .081]        | -.021 [-.072; .030]     | -.006 [-.021; .008]     | .000 [-.007; .008]      |
| <u>Language</u>         |                     |                           |                         |                         |                         |
| Step 1                  | Age                 | -.007 [-.017; .002]       | -.009* [-.016; -.002]   | -.002* [-.003; .000]    | -.002*** [-.002; -.001] |
|                         | Sex/gender (female) | -.047 [-.123; .028]       | .038 [-.014; .090]      | .005 [-.007; .017]      | .005 [-.001; .011]      |
|                         | Race (Black)        | -.273*** [-.371; -.175]   | -.373*** [-.438; -.308] | .001 [-.014; .016]      | -.004 [-.011; .002]     |
|                         | Race (Hispanic)     | -.595*** [-.696; -.495]   | -.764*** [-.826; -.703] | .008 [-.007; .023]      | .003 [-.003; .010]      |
|                         | Memory complaints   | -.013 [-.035; .009]       | -.040*** [-.056; -.025] | -.002 [-.005; .001]     | -.001 [-.003; .000]     |
| Step 2                  | CVD burden          | -.006 [-.042; .031]       | -.015 [-.040; .011]     | -.002 [-.008; .004]     | -.001 [-.004; .001]     |
| Step 3                  | Education           | .068*** [.059; .077]      | .071*** [.065; .078]    | -.001 [-.003; .000]     | .001 [.000; .001]       |
| Step 4                  | CSES                | .041 [-.027; .109]        | .054* [.012; .095]      | -.012* [-.022; -.002]   | -.004* [-.009; .000]    |
| <u>Visuospatial</u>     |                     |                           |                         |                         |                         |
| Step 1                  | Age                 | -.016*** [-.024; -.007]   | -.010** [-.016; -.003]  | .000 [-.002; .001]      | -.001** [-.002; .000]   |
|                         | Sex/gender (female) | -.119*** [-.185; -.053]   | -.018 [-.065; .028]     | .006 [-.005; .017]      | .001 [-.005; .007]      |
|                         | Race (Black)        | -.329*** [-.398; -.260]   | -.329*** [-.378; -.280] | -.008 [-.020; .004]     | -.002 [-.008; .005]     |
|                         | Race (Hispanic)     | -.681*** [-.757; -.605]   | -.654*** [-.706; -.603] | -.006 [-.018; .007]     | -.001 [-.008; .006]     |

|        |                   |                       |                        |                     |                     |
|--------|-------------------|-----------------------|------------------------|---------------------|---------------------|
|        | Memory complaints | .000 [-.022; .022]    | -.022** [-.036; -.007] | -.001 [-.005; .002] | -.001 [-.003; .001] |
| Step 2 | CVD burden        | -.046* [-.080; -.011] | -.020 [-.044; .004]    | -.003 [-.008; .003] | -.002 [-.005; .001] |
| Step 3 | Education         | .060*** [.052; .068]  | .058*** [.052; .064]   | .000 [-.002; .001]  | .001* [.000; .002]  |
| Step 4 | CSES              | .046 [-.010; .103]    | .048* [.011; .085]     | -.003 [-.012; .006] | -.004 [-.009; .001] |

---

*Note.* Est. = estimate, 95% CI = 95% confidence interval; Continuous variables are measured at baseline and centered at their grand mean;

complaints = baseline memory complaints; \*p < .05, \*\*p < .01, \*\*\*p < .001
